# Supplementary material for: A Shortcut from Genome to Drug: The Employment of Bioinformatic Tools to Find New Targets for Gastric Cancer Treatment
Source: MDPI journal article supplement (doi:10.3390/pharmaceutics15092303), 2023-09-12

**Supplementary Table S1** - List of studies for the construction of the meta-data

| Access ID | Samples | Platform                                    |
|-----------|---------|---------------------------------------------|
| GSE13911  | 69      | Affymetrix Human Genome U133 Plus 2.0 array |
| GSE54129  | 132     | Affymetrix Human Genome U133 Plus 2.0 array |
| GSE66229  | 400     | Affymetrix Human Genome U133 Plus 2.0 array |

**Supplementary Table S2** - List of RNAm, NCBI Reference Sequences and  
Primer sequences (forward and reverse complement) for the PCR

| GENE  | CÓDIGO NCBI                                     | SEQUENCE                                         |
|-------|-------------------------------------------------|--------------------------------------------------|
| AJUBA | NM_001289097.2<br>NM_032876.6                   | F-GATGCTGTGGGATTCCTGGC<br>R-GAACTTCTCCAGCAGGCGAC |
| CD80  | NM_005191.4                                     | F-GGATTGTCATCAGCCCTGCC<br>R-GAGAAAGACCAGCCAGCACC |
| NOLC1 | NM_001284388.2<br>NM_004741.5<br>NM_001284389.2 | F-GCTCTCCAAGACCACAAGCC<br>R-CCTCCCTGACCCTTCGGAAT |
| KNL1  | NM_144508.5<br>NM_170589.5                      | F-CTACCACCCCTTCCAGAGCA<br>R-TGGCGGTAGAGAGGTGGTTT |

**Supplementary Table S3** – List of top 10 ligands identified by screening MCULE's purchasable library using AutoDock Vina for the AJUBA target, organized in descending order of minimum energy value. Results obtained for prediction of toxicity class, toxicity endpoint models, docking score by DockThor server and final punctuation

| <i>MCULE ID</i>              | <i>Docking Score<br/>Mcule<br/>(Kcal mol<sup>-1</sup>)</i> | <i>Predicted<br/>Toxicity Class</i> | <i>Toxicity Endpoint<br/>Models</i> | <i>Docking Score<br/>DockThor<br/>(Kcal mol<sup>-1</sup>)</i> | <i>Punctuation</i> |
|------------------------------|------------------------------------------------------------|-------------------------------------|-------------------------------------|---------------------------------------------------------------|--------------------|
| <b>MCULE-2386589557-0-6*</b> | -7.3                                                       | 5                                   | Inactive                            | -8.483                                                        | 2                  |
| <b>MCULE-8494477087-0-5*</b> | -7.1                                                       | 5                                   | Inactive                            | -7.767                                                        | 1.75               |
| MCULE-8618831675-0-4         | -7.1                                                       | 3                                   | Active                              |                                                               |                    |
| MCULE-4680685315-0-2         | -7.1                                                       | 4                                   | Active                              |                                                               |                    |
| MCULE-3694094262-0-3         | -7.1                                                       | 4                                   | Active                              |                                                               |                    |
| MCULE-8663038790-0-3         | -6.9                                                       | 4                                   | Active                              |                                                               |                    |
| MCULE-6320162783-0-1         | -6.9                                                       | 4                                   | Active                              |                                                               |                    |
| MCULE-8680129923-0-1         | -6.9                                                       | 4                                   | Active                              |                                                               |                    |
| <b>MCULE-5479669360-0-2*</b> | -6.9                                                       | 4                                   | Inactive                            | -7.488                                                        | 1.50               |
| MCULE-4497233309-0-6         | -6.8                                                       | 3                                   | Active                              |                                                               |                    |

\*: Compounds selected for the molecular docking step on the DockThor server. Compounds with favorable toxicological properties were chosen as a selection criterion, without prediction for the toxicity endpoint models and with a prediction of toxicity class equal to or greater than 4.

**Supplementary Table S4** – List of top 10 ligands identified by screening MCULE’s purchasable library using AutoDock Vina for the CD80 target, organized in descending order of minimum energy value. Results obtained for prediction of toxicity class, toxicity endpoint models, docking score by DockThor server and final punctuation

| <i>MCULE ID</i>              | <i>Docking Score<br/>Mcule<br/>(Kcal mol<sup>-1</sup>)</i> | <i>Predicted<br/>Toxicity Class</i> | <i>Toxicity Endpoint<br/>Models</i> | <i>Docking Score<br/>DockThor<br/>(Kcal mol<sup>-1</sup>)</i> | <i>Punctuation</i> |
|------------------------------|------------------------------------------------------------|-------------------------------------|-------------------------------------|---------------------------------------------------------------|--------------------|
| MCULE-9029233932-0-3         | -6.5                                                       | 4                                   | Active                              |                                                               |                    |
| MCULE-2278849636-0-73        | -5.8                                                       | 4                                   | Active                              |                                                               |                    |
| MCULE-7527853534-0-1         | -5.7                                                       | 3                                   | Active                              |                                                               |                    |
| MCULE-7110142890-0-1         | -5.7                                                       | 4                                   | Active                              |                                                               |                    |
| MCULE-4428265531-0-1         | -5.7                                                       | 4                                   | Active                              |                                                               |                    |
| <b>MCULE-2625873551-0-8*</b> | -5.6                                                       | 4                                   | Inactive                            | -7.387                                                        | 1.875              |
| <b>MCULE-9178344200-0-1*</b> | -5.6                                                       | 4                                   | Inactive                            | -7.773                                                        | 2                  |
| MCULE-5779193146-0-2         | -5.6                                                       | 3                                   | Active                              |                                                               |                    |
| <b>MCULE-4809120560-0-2*</b> | -5.6                                                       | 4                                   | Inactive                            | -7.375                                                        | 1.75               |
| MCULE-2768743746-0-1         | -5.6                                                       | 4                                   | Active                              |                                                               |                    |

\*: Compounds selected for the molecular docking step on the DockThor server. Compounds with favorable toxicological properties were chosen as a selection criterion, without prediction for the toxicity endpoint models and with a prediction of toxicity class equal to or greater than 4.

**Supplementary Table S5**– List of top 10 ligands identified by screening MCULE’s purchasable library using AutoDock Vina for the NOLC1 target, organized in descending order of minimum energy value. Results obtained for prediction of toxicity class, toxicity endpoint models, docking score by DockThor server and final punctuation

| <i>MCULE ID</i>               | <i>Docking Score<br/>Mcule<br/>(Kcal mol<sup>-1</sup>)</i> | <i>Predicted<br/>Toxicity Class</i> | <i>Toxicity Endpoint<br/>Models</i> | <i>Docking Score<br/>DockThor<br/>(Kcal mol<sup>-1</sup>)</i> | <i>Punctuation</i> |
|-------------------------------|------------------------------------------------------------|-------------------------------------|-------------------------------------|---------------------------------------------------------------|--------------------|
| MCULE-5664033778-0-1          | -8.6                                                       | 4                                   | Active                              |                                                               |                    |
| MCULE-1565012771-0-2          | -8.0                                                       | 3                                   | Inactive                            |                                                               |                    |
| MCULE-3493609194-0-3          | -7.8                                                       | 4                                   | Active                              |                                                               |                    |
| MCULE-7733662288-0-1          | -7.7                                                       | 4                                   | Active                              |                                                               |                    |
| MCULE-5092204522-0-3          | -7.7                                                       | 5                                   | Active                              |                                                               |                    |
| MCULE-7508528499-0-3          | -7.6                                                       | 4                                   | Active                              |                                                               |                    |
| <b>MCULE-2888284016-0-4*</b>  | -7.6                                                       | 4                                   | Inactive                            | -8.502                                                        | 1.75               |
| <b>MCULE-5881513100-0-29*</b> | -7.5                                                       | 4                                   | Inactive                            | -7.260                                                        | 1.5                |
| MCULE-6651045318-0-2          | -7.5                                                       | 4                                   | Active                              |                                                               |                    |
| MCULE-5189774934-0-5          | -7.4                                                       | 4                                   | Active                              |                                                               |                    |

\*: Compounds selected for the molecular docking step on the DockThor server. Compounds with favorable toxicological properties were chosen as a selection criterion, without prediction for the toxicity endpoint models and with a prediction of toxicity class equal to or greater than 4. Compound MCULE-5881513100-0-29 was selected over MCULE-2888284016-0-4 because the synthesis of this compound has been discontinued by the company Mcule.

**Supplementary Figure S1.** Enrichment plots of genes were analyzed using Gene Set Enrichment Analysis (GSEA).

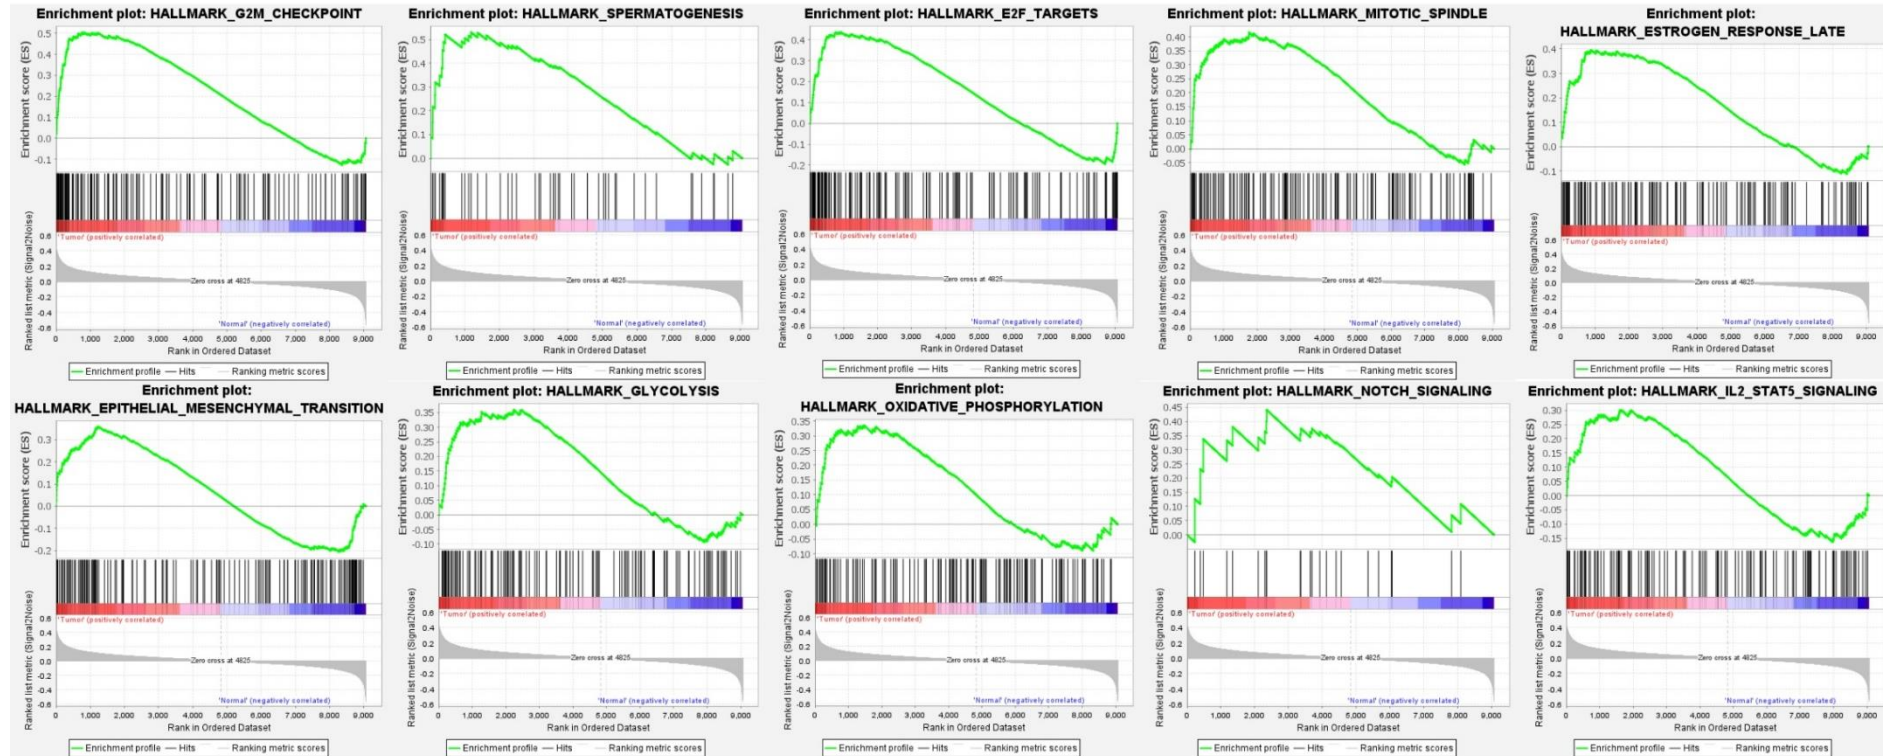

Supplement: s1 [file s1]
